# Supplementary material
Source: PubMed Central journal article supplement (PMC7109233)
Supplement: 13224_2019_1288_MOESM2_ESM.pdf [file 13224_2019_1288_MOESM2_ESM.pdf]

IRMANDADE DA SANTA CASA  
DE MISERICORDIA DE PORTO  
ALEGRE - ISCMPA

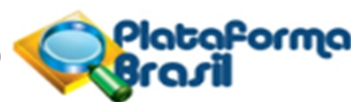

**PARECER CONSUBSTANCIADO DO CEP**

**DADOS DA EMENDA**

**Título da Pesquisa:** Prevalência dos Distúrbios da Micção e Efetividade de Tratamento em Ambulatório de Urologia Especializado.

**Pesquisador:** Marina Gressler

**Área Temática:**

**Versão:** 5

**CAAE:** 15106913.0.0000.5335

**Instituição Proponente:** ISCMPA

**Patrocinador Principal:** Financiamento Próprio

**DADOS DO PARECER**

**Número do Parecer:** 1.447.296

**Apresentação do Projeto:**

Conforme descrito no parecer consubstanciado.

**Objetivo da Pesquisa:**

Objetivo da emenda:

Solicitar a extensão do prazo do cronograma e apresentação do relatório semestral.

**Avaliação dos Riscos e Benefícios:**

Descritos e adequados.

**Comentários e Considerações sobre a Pesquisa:**

Apresentado cronograma atualizado e relatório devidamente preenchido.

**Considerações sobre os Termos de apresentação obrigatória:**

Apresentados e adequados.

**Recomendações:**

**Conclusões ou Pendências e Lista de Inadequações:**

Não se aplica.

**Considerações Finais a critério do CEP:**

Após avaliação das alterações efetuadas no estudo acima descrito, o presente Comitê não

**Endereço:** R. Profº Annes Dias, 295 Hosp. Dom Vicente Scherer

**Bairro:** 6º andar - Centro

**CEP:** 90.020-090

**UF:** RS

**Município:** PORTO ALEGRE

**Telefone:** (51)3214-8571

**Fax:** (51)3214-8571

**E-mail:** cep@santacasa.tche.br

**IRMANDADE DA SANTA CASA  
DE MISERICORDIA DE PORTO  
ALEGRE - ISCMPA**

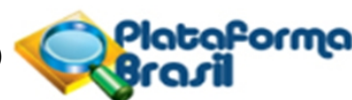

Continuação do Parecer: 1.447.296

encontrou óbices quanto à implementação das mesmas.

**Este parecer foi elaborado baseado nos documentos abaixo relacionados:**

| Tipo Documento                                            | Arquivo                                                                    | Postagem               | Autor           | Situação |
|-----------------------------------------------------------|----------------------------------------------------------------------------|------------------------|-----------------|----------|
| Informações Básicas do Projeto                            | PB_INFORMAÇÕES_BÁSICAS_666114 E2.pdf                                       | 22/02/2016<br>22:05:16 |                 | Aceito   |
| Outros                                                    | Relatorio.docx                                                             | 22/02/2016<br>22:04:07 | Marina Gressler | Aceito   |
| Outros                                                    | Pedido.docx                                                                | 22/02/2016<br>22:02:53 | Marina Gressler | Aceito   |
| Outros                                                    | Cronograma.docx                                                            | 22/02/2016<br>22:02:00 | Marina Gressler | Aceito   |
| Outros                                                    | relatório semestral.docx                                                   | 15/10/2014<br>11:00:02 |                 | Aceito   |
| Outros                                                    | Trabalho world com alteração cronograma.docx                               | 15/10/2014<br>10:59:15 |                 | Aceito   |
| Folha de Rosto                                            | Folha de rosto assinada.pdf                                                | 22/08/2014<br>06:44:41 |                 | Aceito   |
| Outros                                                    | Sem título 1.doc                                                           | 04/08/2014<br>18:13:18 |                 | Aceito   |
| TCLE / Termos de Assentimento / Justificativa de Ausência | Consetimento informado trabalho.odt                                        | 09/08/2013<br>15:13:18 |                 | Aceito   |
| Outros                                                    | TRABALHO CONCLUSÃO.odt                                                     | 06/08/2013<br>14:05:10 |                 | Aceito   |
| Outros                                                    | FOLHA.jpg                                                                  | 29/04/2013<br>11:54:16 |                 | Aceito   |
| Outros                                                    | Formulário de encaminhamento de projeto de pesquisa em seres humanos 2.jpg | 15/04/2013<br>17:11:53 |                 | Aceito   |
| Outros                                                    | Formulário de encaminhamento de projeto de pesquisa em seres humanos 1.jpg | 15/04/2013<br>17:10:51 |                 | Aceito   |
| Outros                                                    | Termo de compromisso entrega de relatório semestral.jpg                    | 15/04/2013<br>17:10:38 |                 | Aceito   |
| Outros                                                    | Cronograma e Orçamento.jpg                                                 | 15/04/2013<br>17:08:59 |                 | Aceito   |
| Projeto Detalhado / Brochura Investigador                 | trabalho de conclusão (Reparado).docx                                      | 10/04/2013<br>10:10:33 |                 | Aceito   |
| Folha de Rosto                                            | doc3.jpg                                                                   | 09/04/2013<br>16:37:54 |                 | Aceito   |
| Outros                                                    | declaração06.jpg                                                           | 28/03/2013             |                 | Aceito   |

**Endereço:** R. Profº Annes Dias,295 Hosp.Dom Vicente Scherer  
**Bairro:** 6º andar - Centro **CEP:** 90.020-090  
**UF:** RS **Município:** PORTO ALEGRE  
**Telefone:** (51)3214-8571 **Fax:** (51)3214-8571 **E-mail:** cep@santacasa.tche.br

IRMANDADE DA SANTA CASA  
DE MISERICORDIA DE PORTO  
ALEGRE - ISCMPA



Continuação do Parecer: 1.447.296

|        |                  |                        |  |        |
|--------|------------------|------------------------|--|--------|
| Outros | declaração6.jpg  | 10:43:19               |  | Aceito |
| Outros | declaração5.jpg  | 28/03/2013<br>10:43:05 |  | Aceito |
| Outros | declaração4.jpg  | 28/03/2013<br>10:42:57 |  | Aceito |
| Outros | declaracao3.jpg  | 28/03/2013<br>10:42:47 |  | Aceito |
| Outros | declaracao2.jpg  | 28/03/2013<br>10:42:39 |  | Aceito |
| Outros | declaração 1.jpg | 28/03/2013<br>10:42:29 |  | Aceito |

**Situação do Parecer:**

Aprovado

**Necessita Apreciação da CONEP:**

Não

PORTO ALEGRE, 11 de Março de 2016

---

**Assinado por:**  
**Carlos Henrique Munhoz Olea**  
**(Coordenador)**

**Endereço:** R. Profº Annes Dias,295 Hosp.Dom Vicente Scherer  
**Bairro:** 6º andar - Centro **CEP:** 90.020-090  
**UF:** RS **Município:** PORTO ALEGRE  
**Telefone:** (51)3214-8571 **Fax:** (51)3214-8571 **E-mail:** cep@santacasa.tche.br
